# Supplementary figures and images for: Phenol adsorption from aqueous solutions by functionalized multiwalled carbon nanotubes with a pyrazoline derivative in the presence of ultrasound
Source: Royal Society of Chemistry journal article supplement (doi:10.1039/c5ra02800k), 2015-01-01

### Pseudo-first-order model

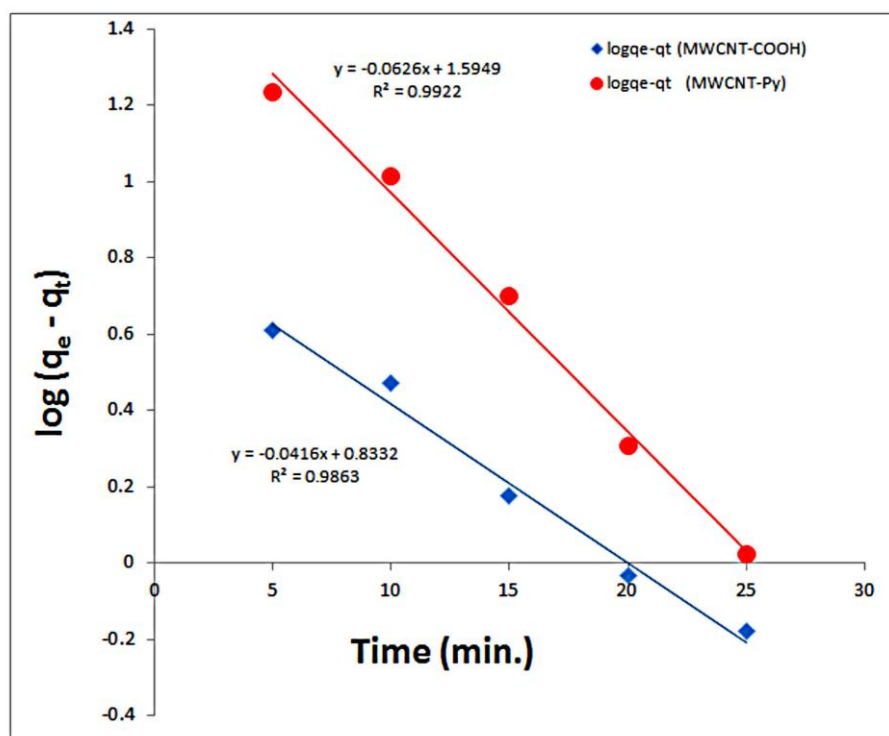

### Pseudo-second-order model

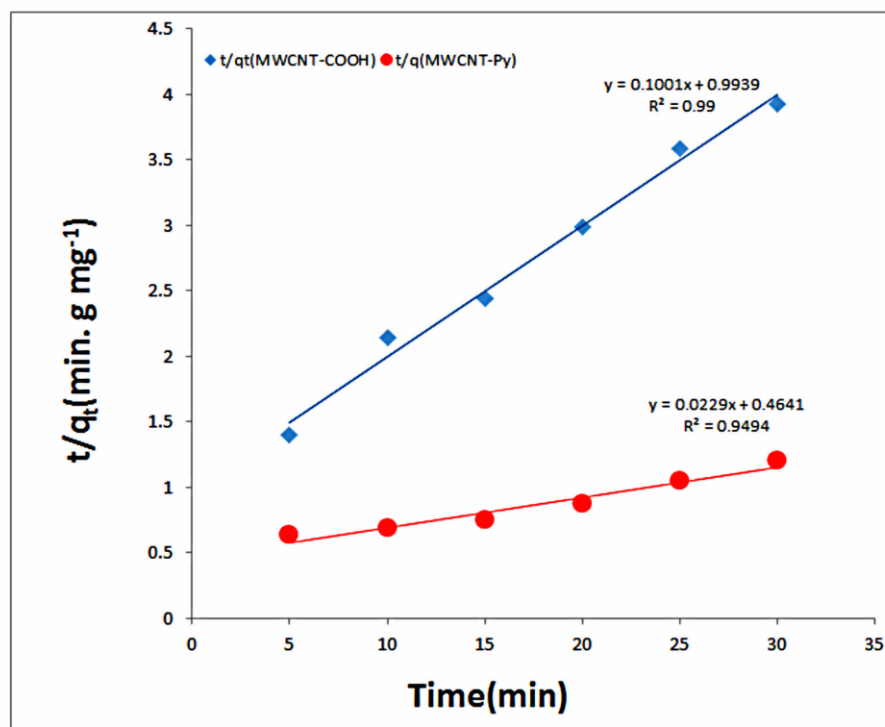

## Elovich model

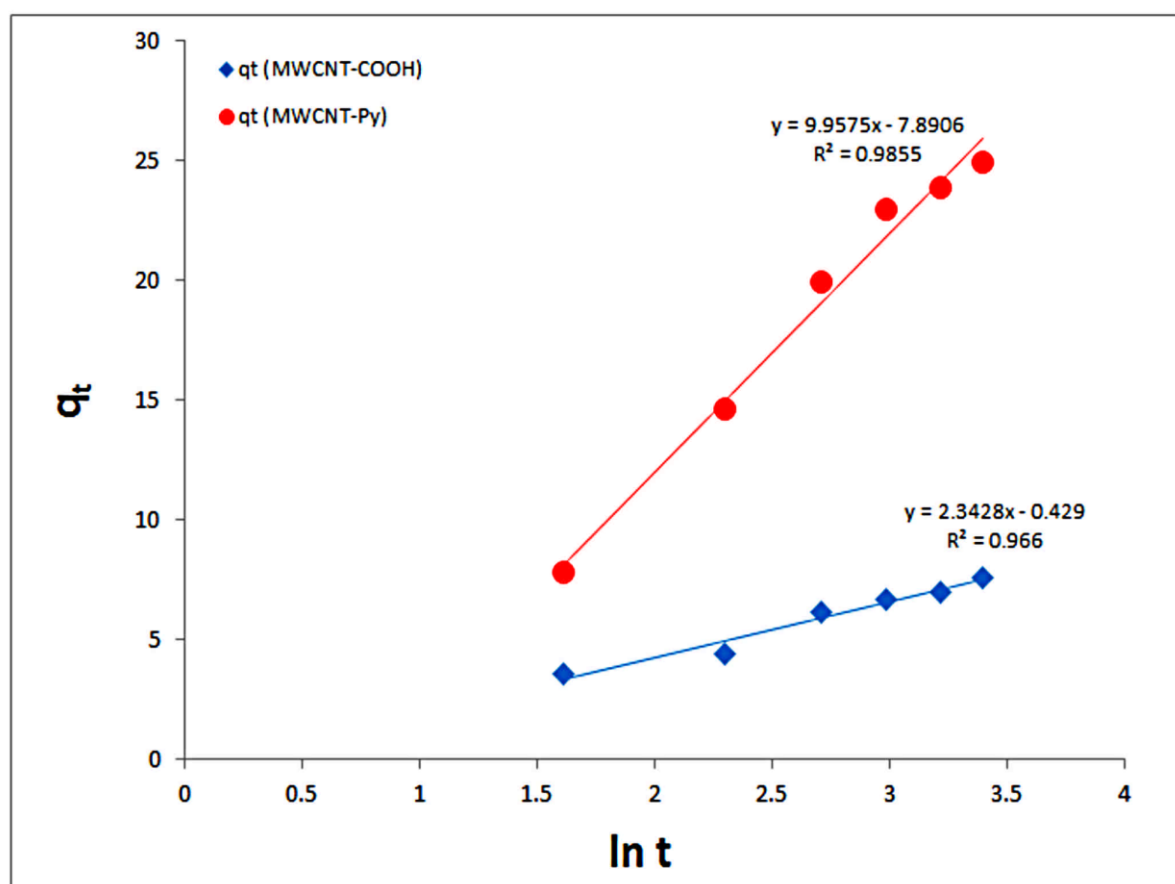

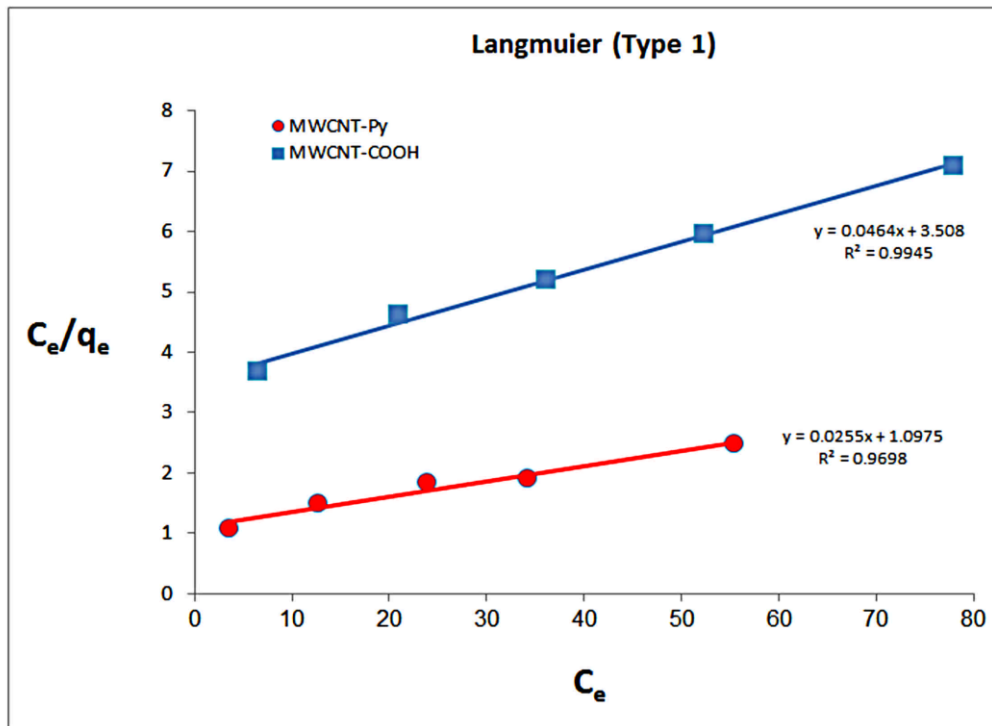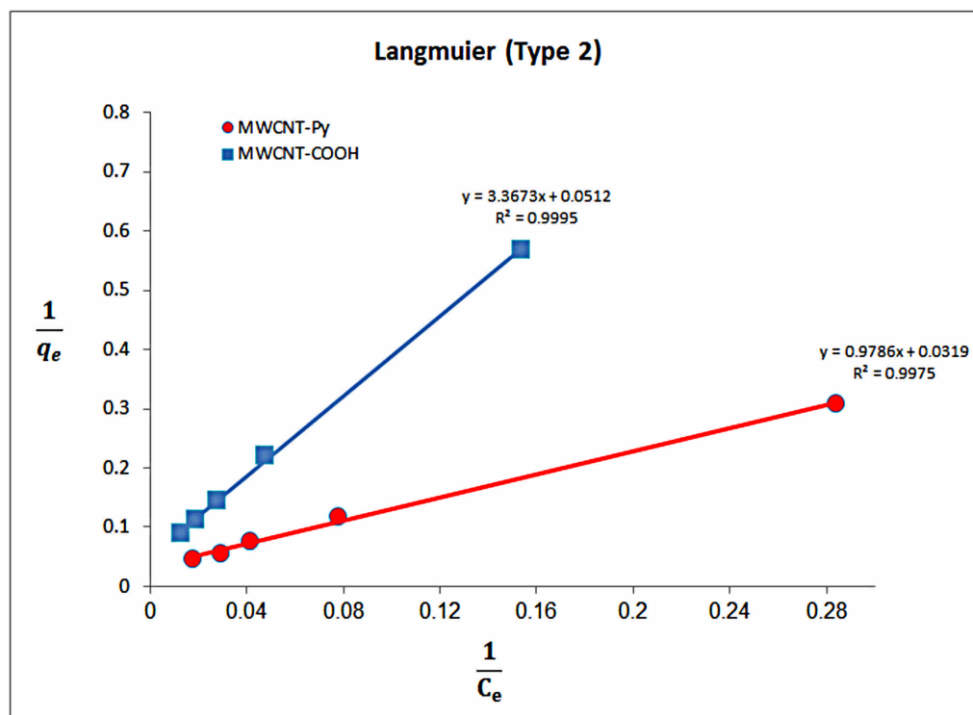

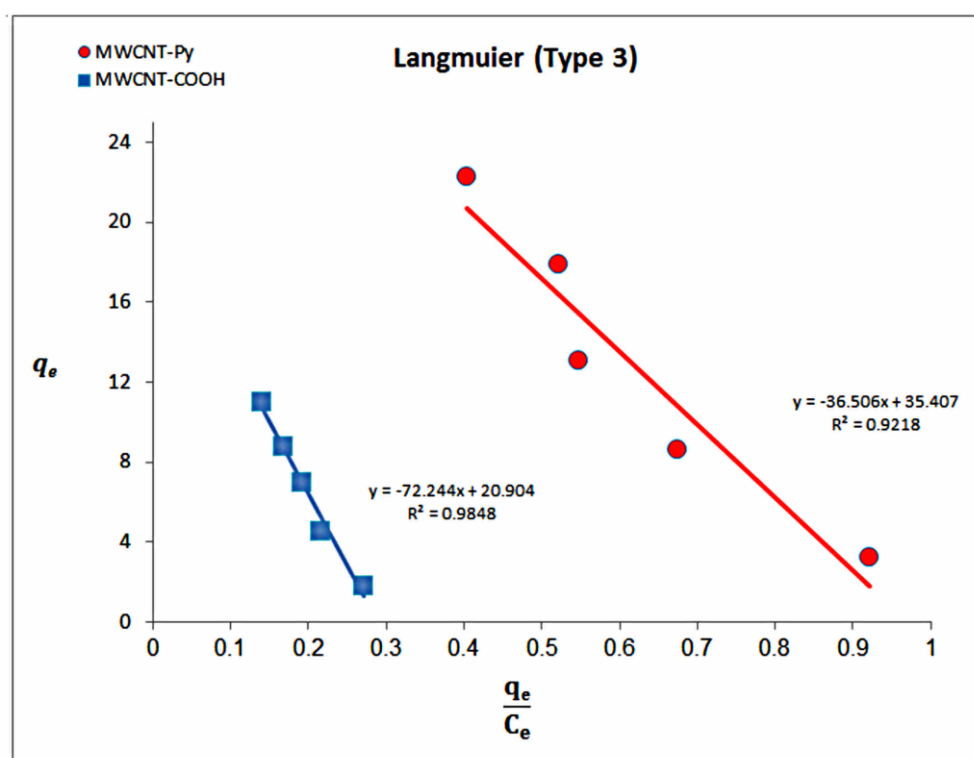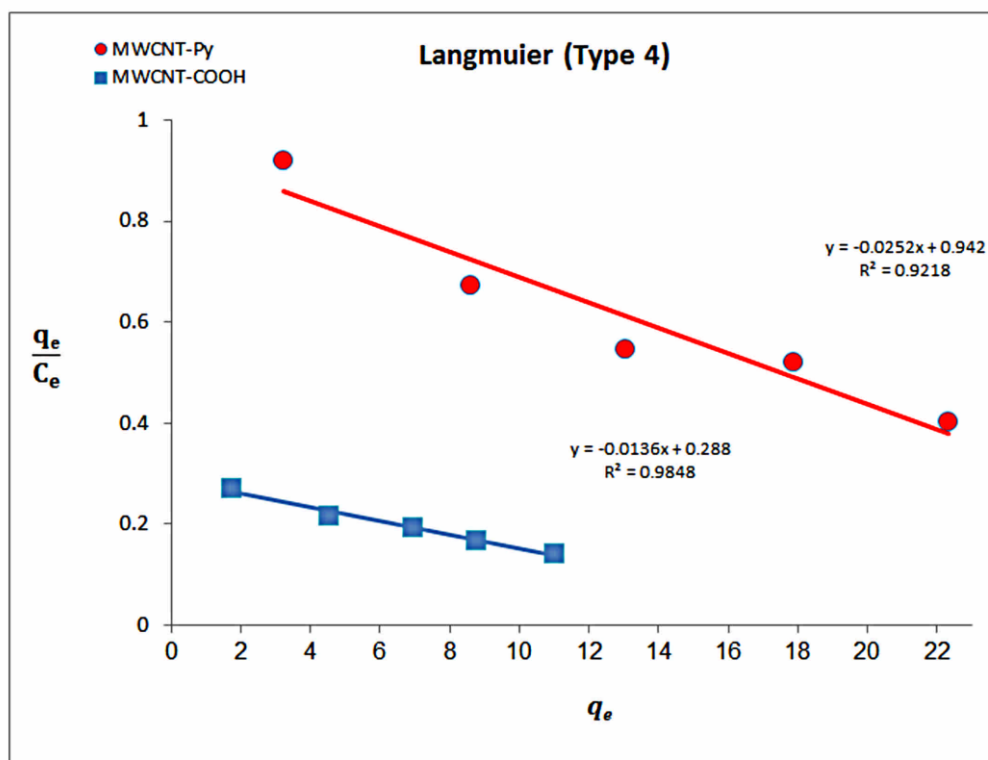

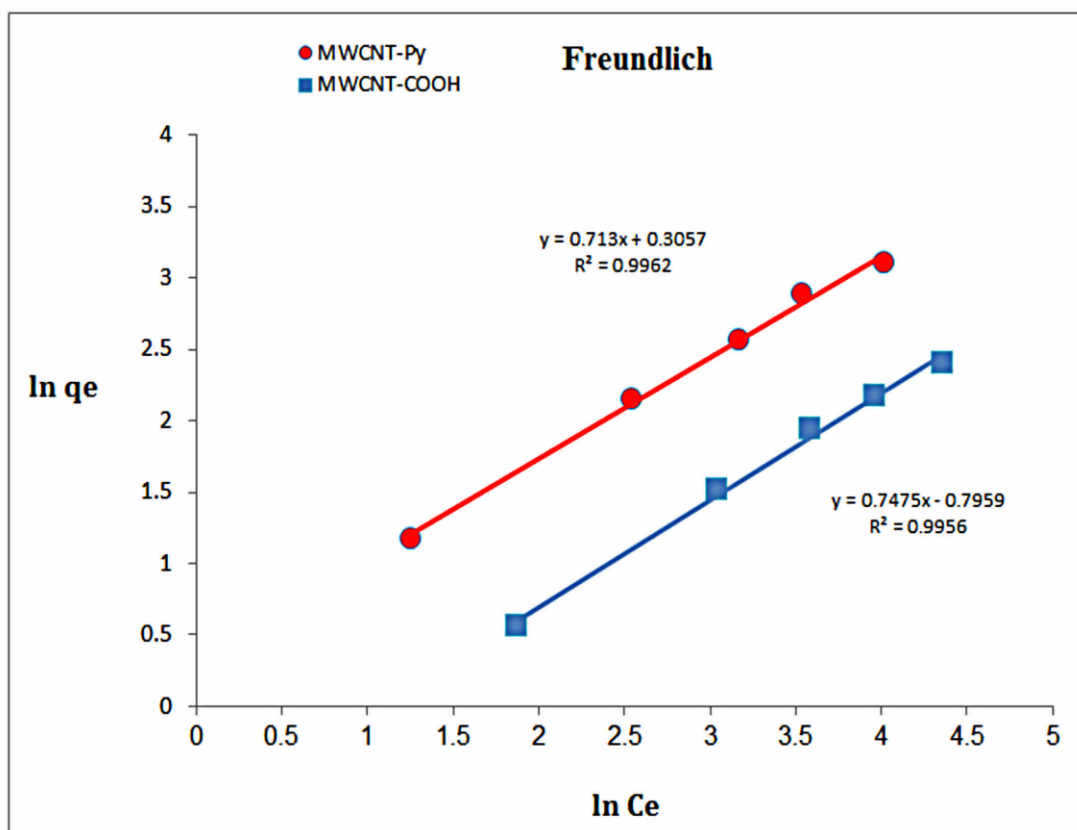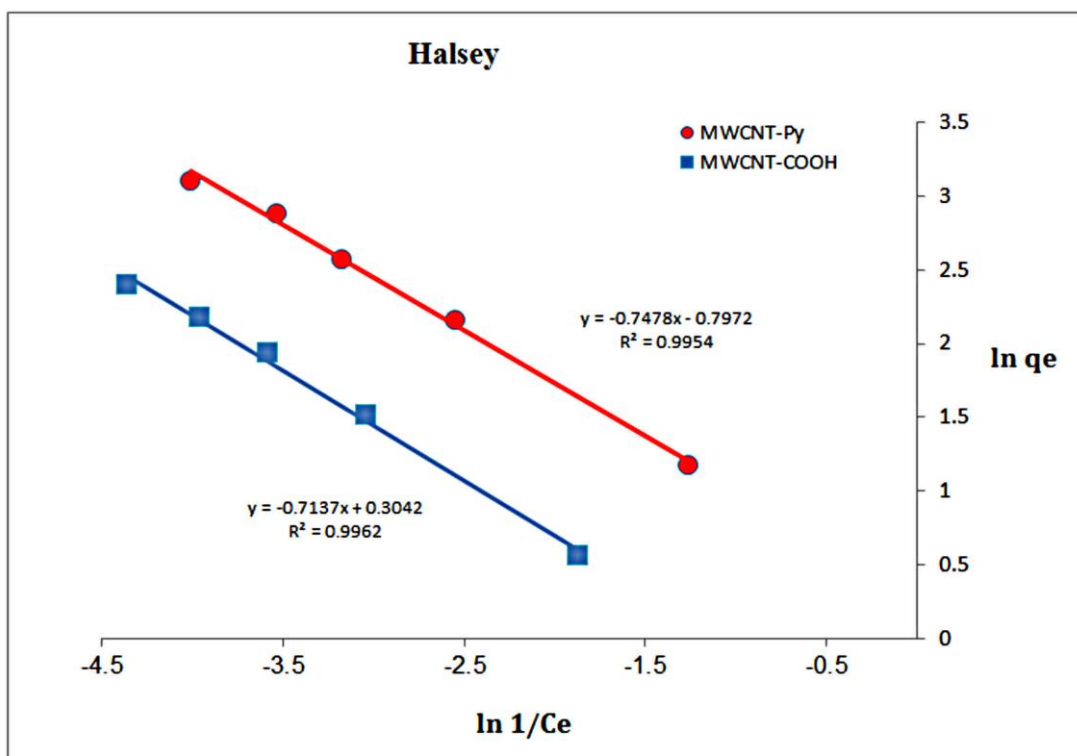

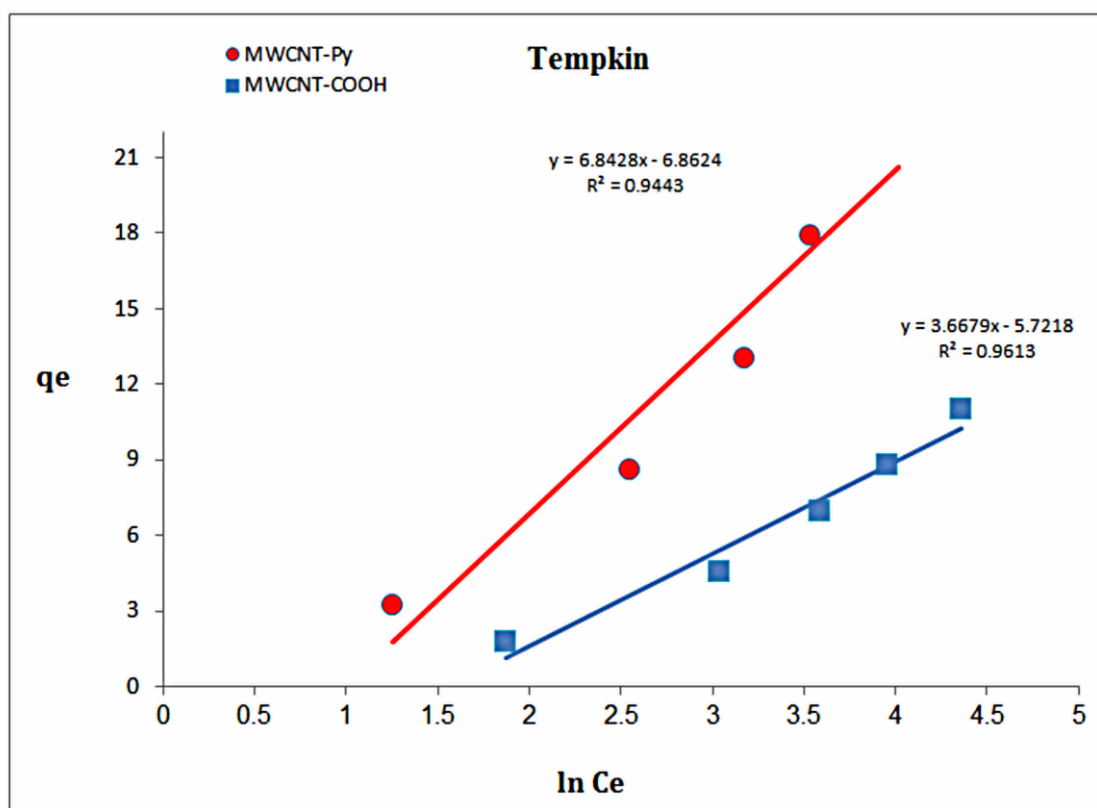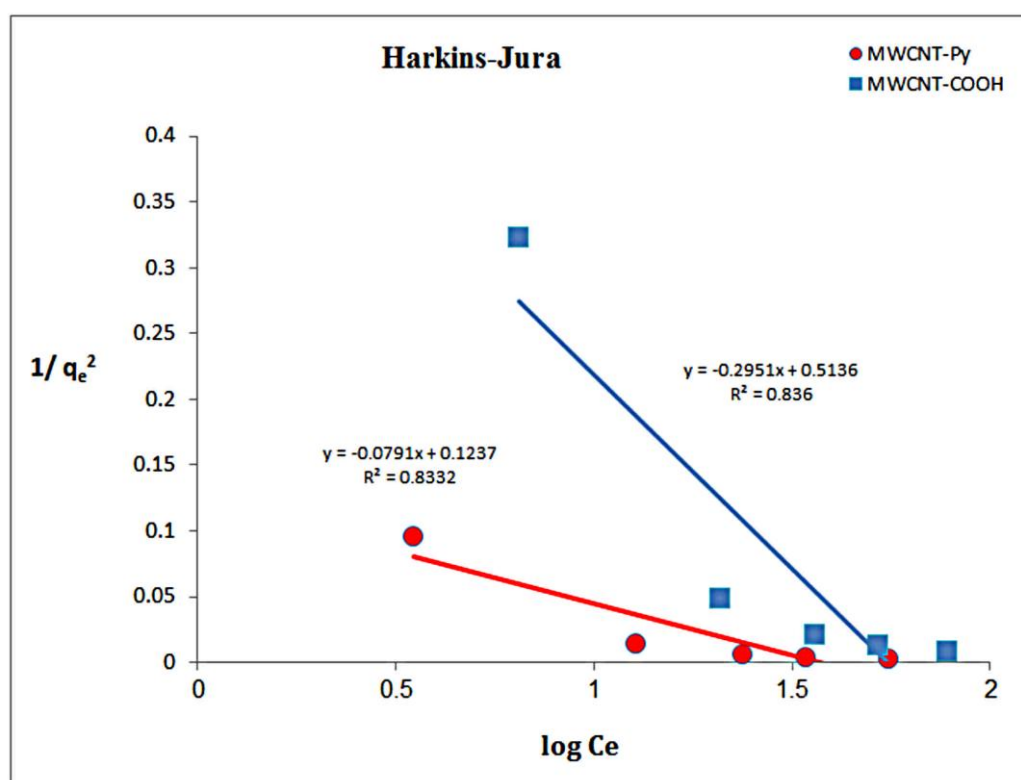

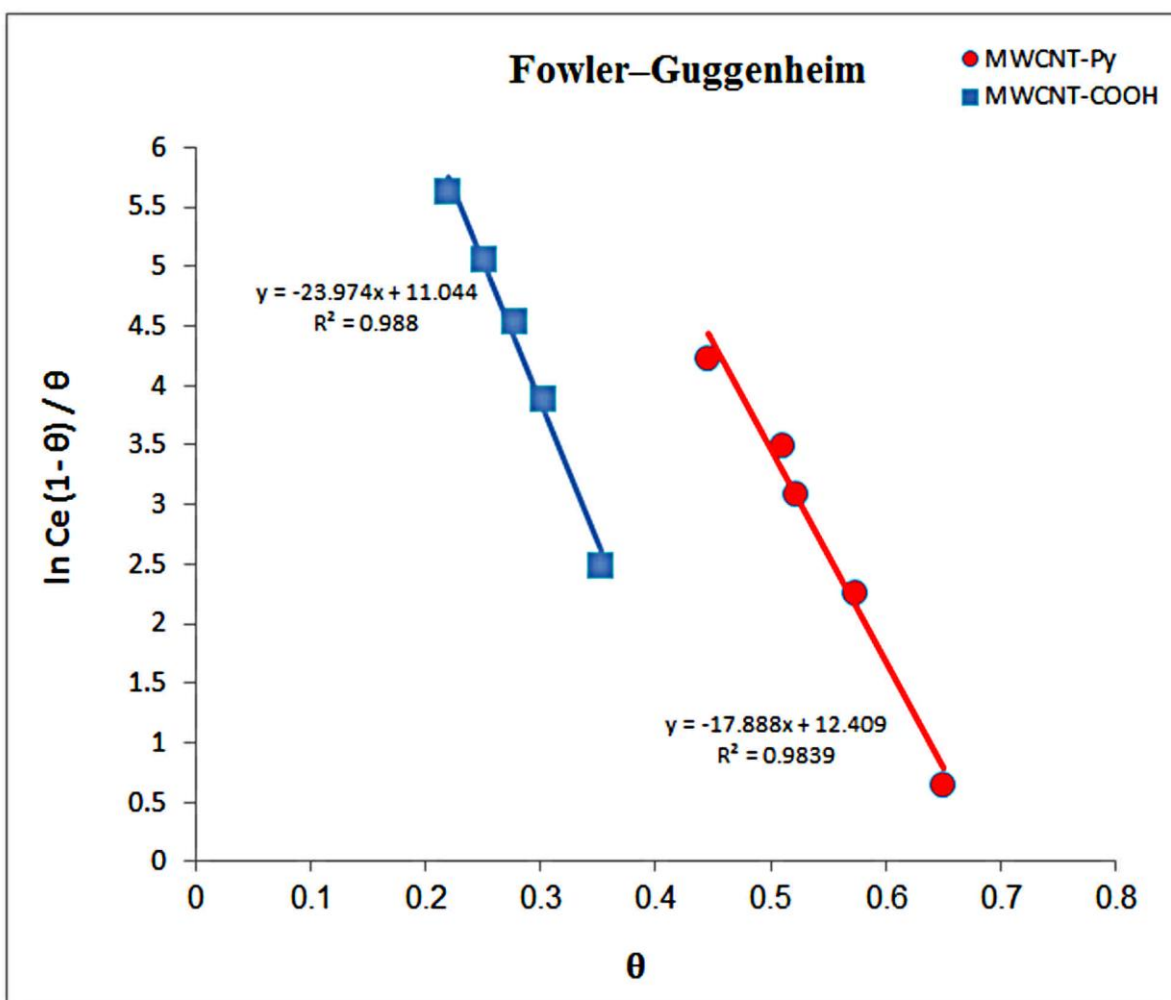

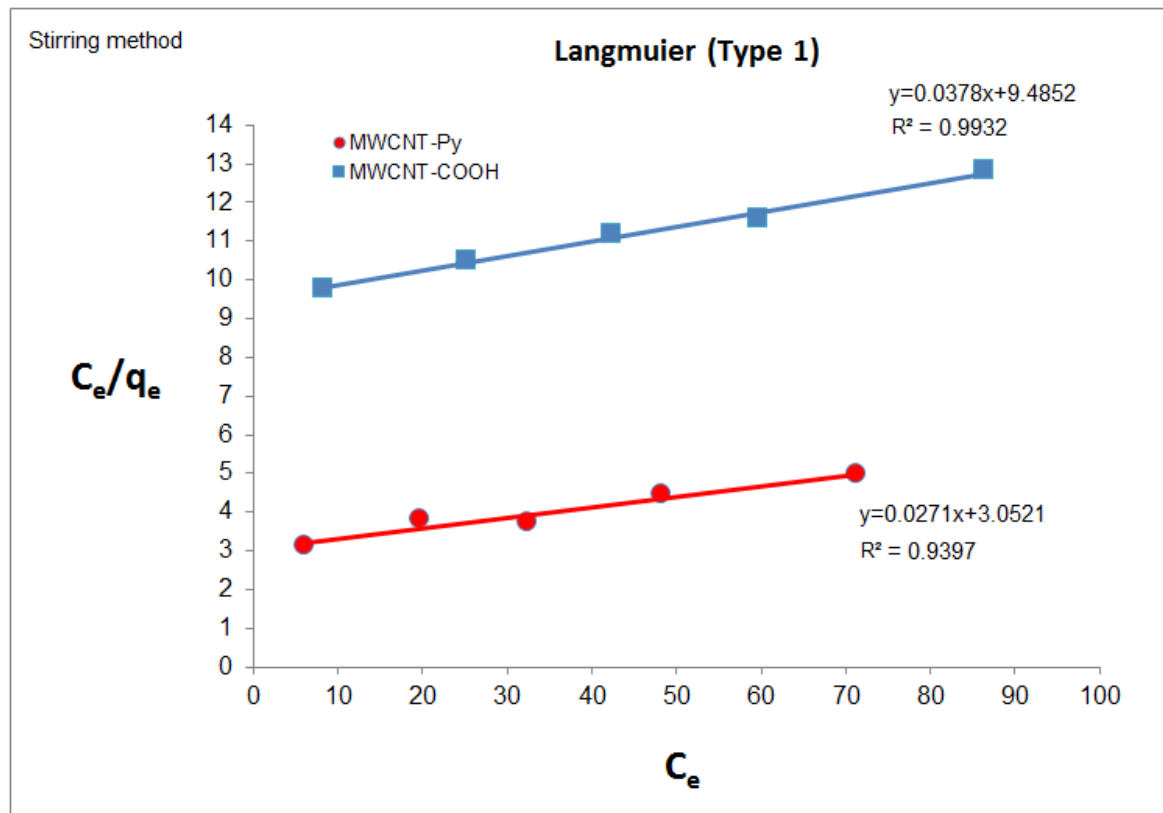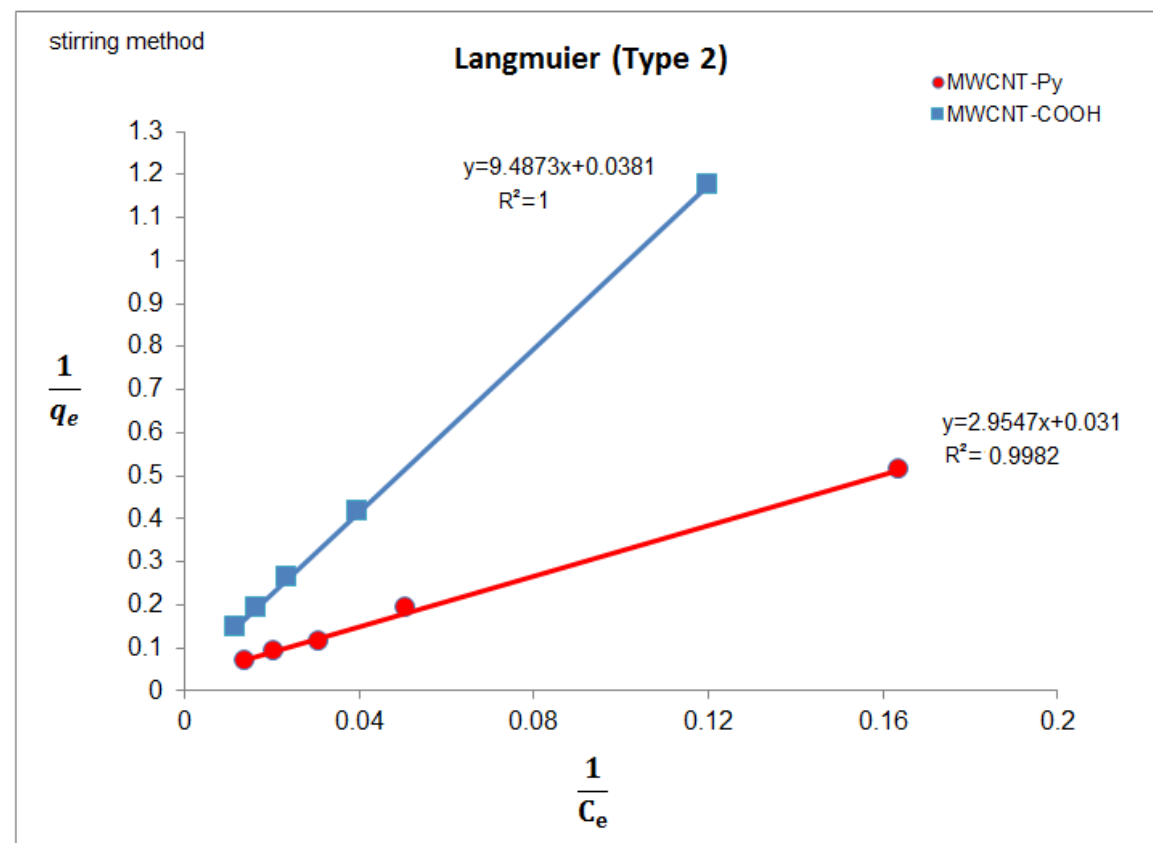



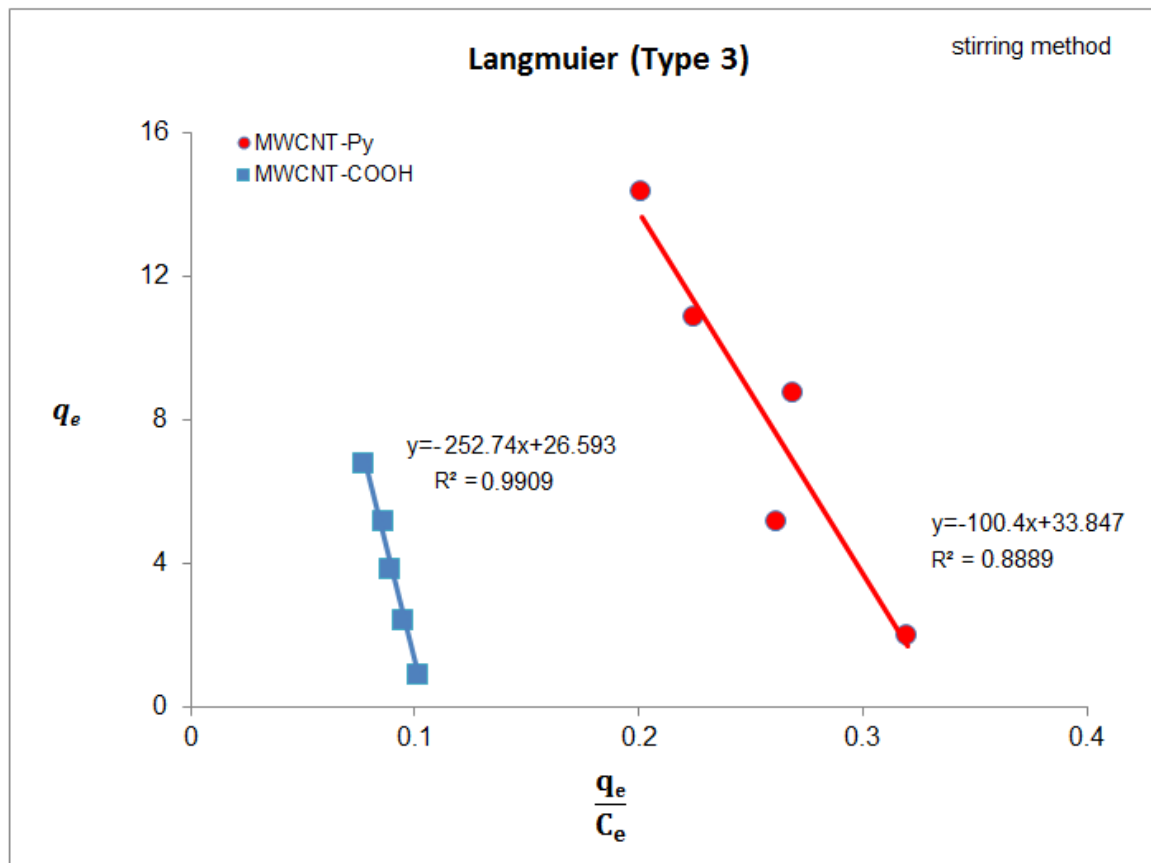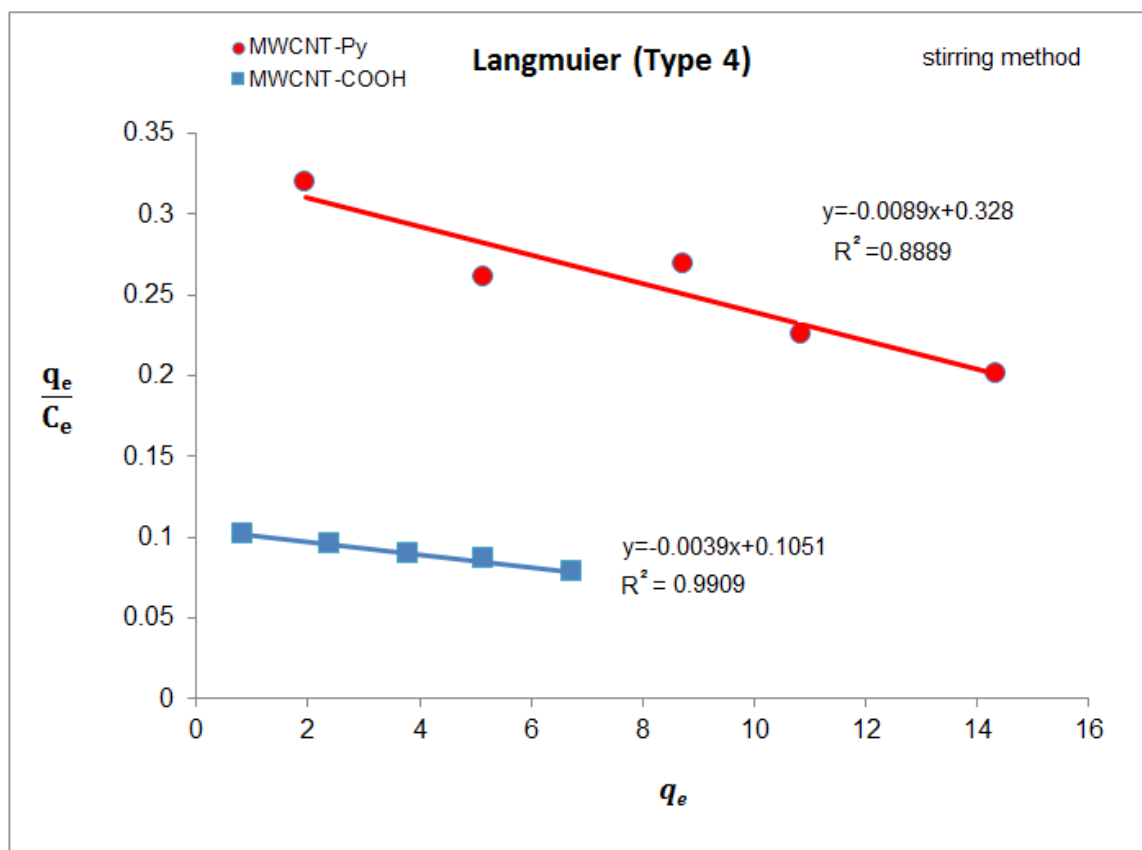

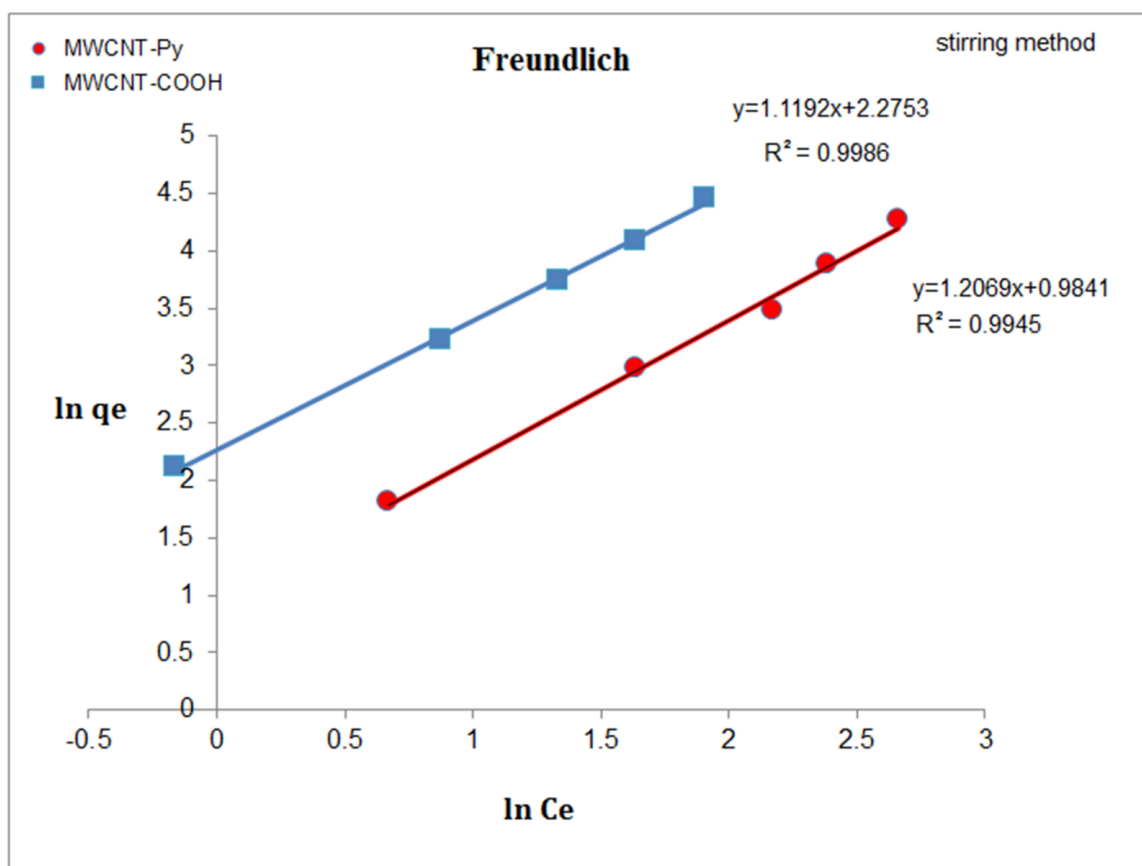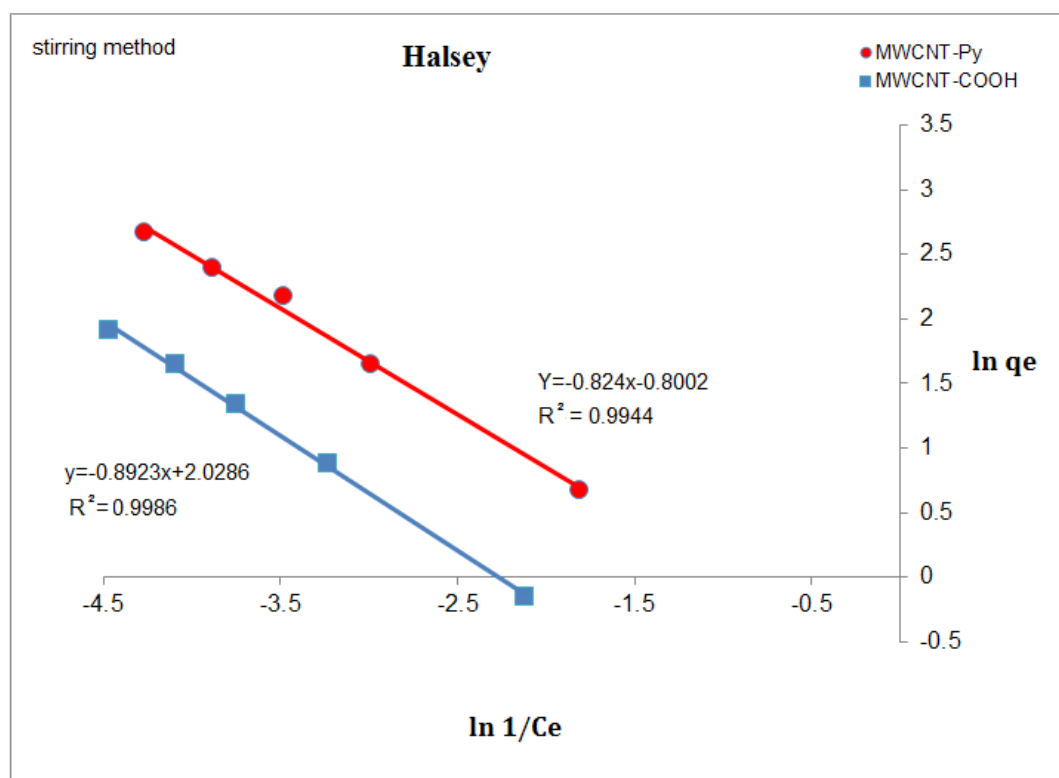

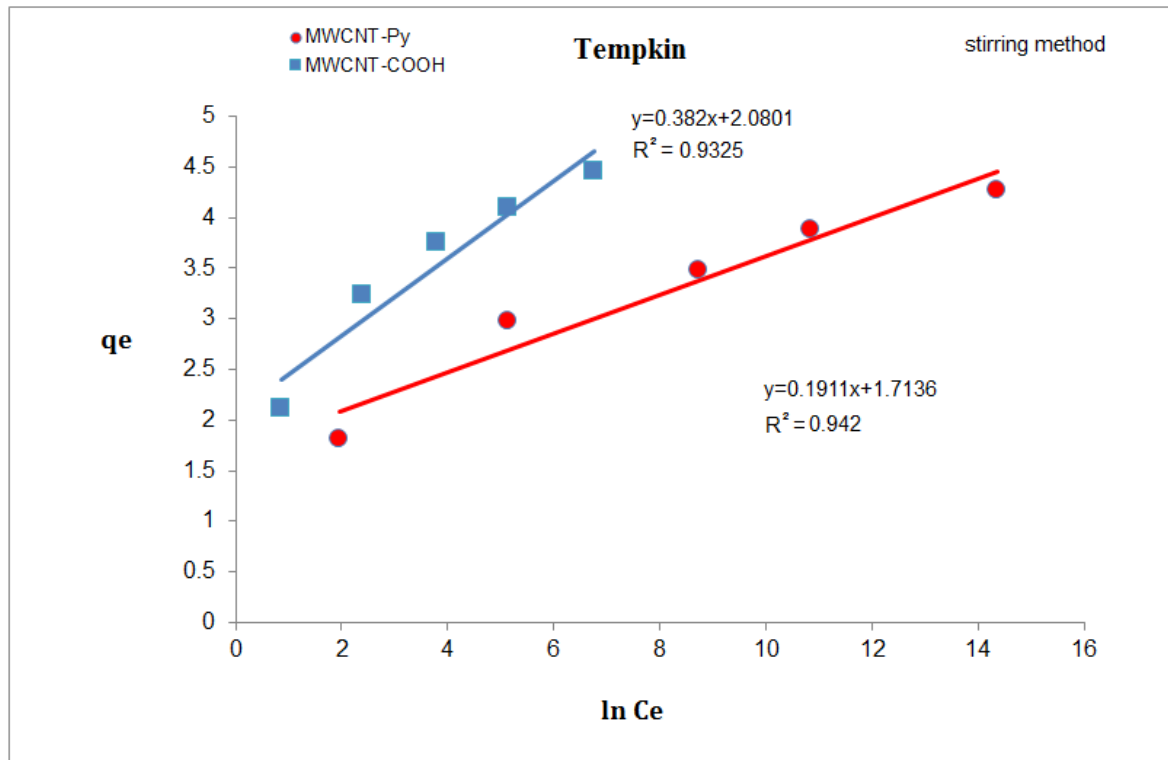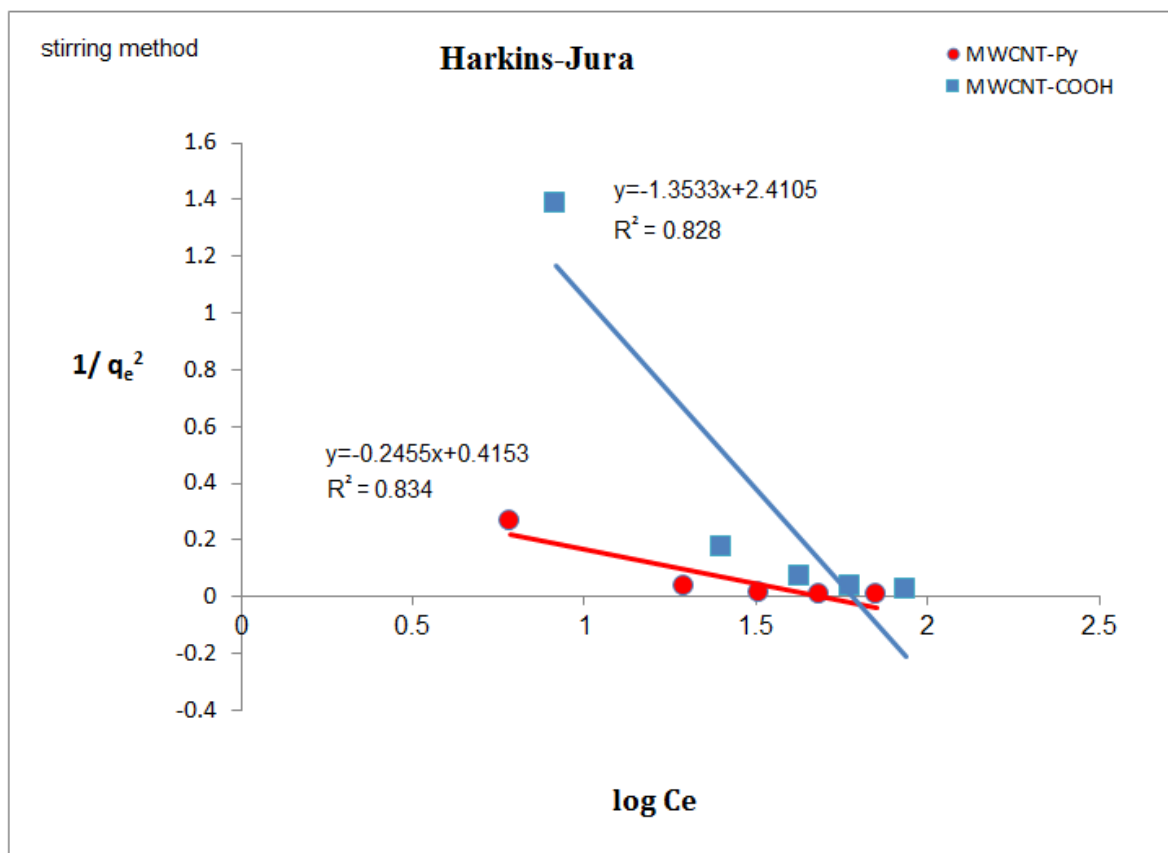

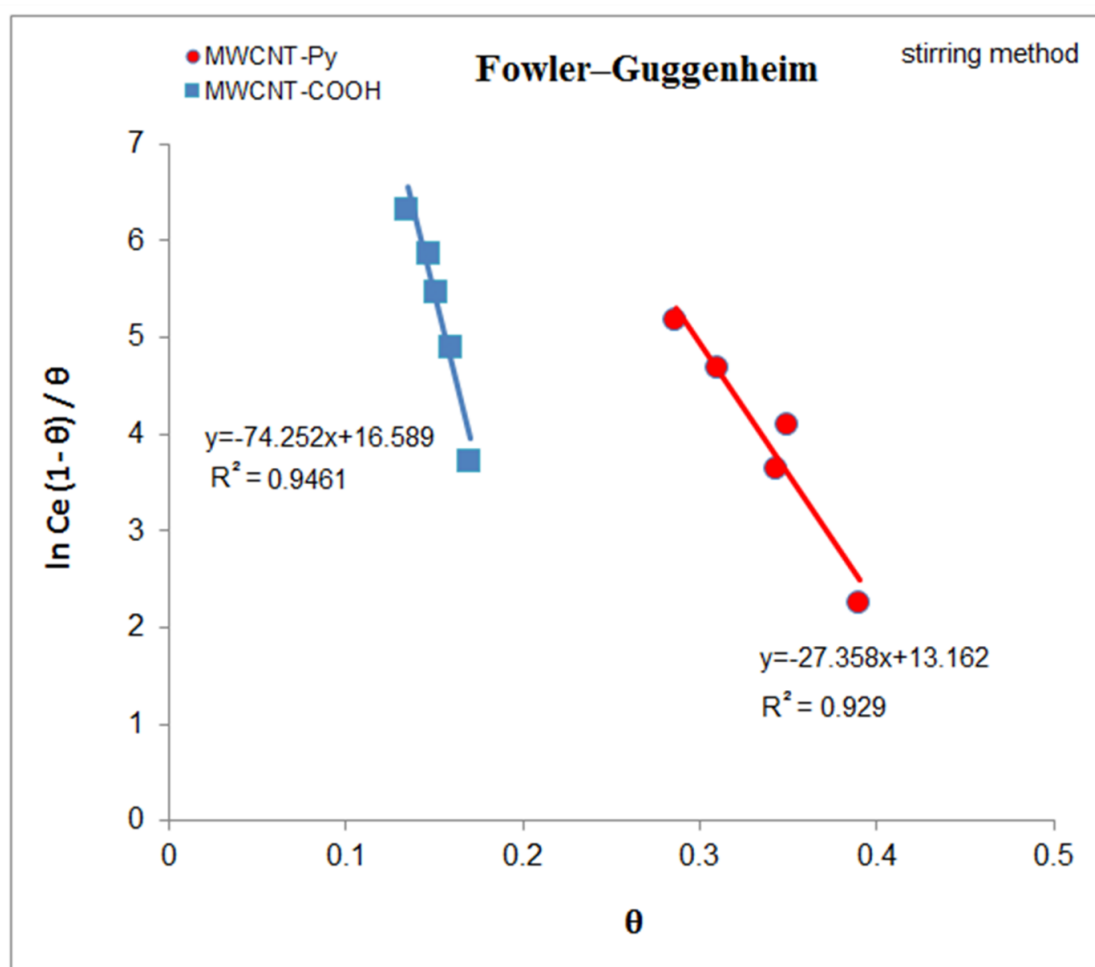

Supplement: c5ra02800k1.pdf [file c5ra02800k1.pdf]
